# Supplementary material for: Synthesis of high contrast fluorescein-diethers for rapid bench-top sensing of palladium
Source: Royal Society of Chemistry journal article supplement (doi:10.1039/c5cc02192h), 2015-01-01

SUPPORTING INFORMATION

Synthesis of High Contrast Fluorescein-Diethers for Rapid Bench-Top  
Sensing of Palladium

Weston R. Kitley, Peter J. Santa Maria, Ryan A. Cloyd, Laura M. Wysocki\*

*Janelia Research Campus, Howard Hughes Medical Institute, 19700 Helix Dr., Ashburn, VA  
20147*

*Wabash College, 301 W. Wabash Ave., Crawfordsville, IN 47933*

Email: [wysockil@wabash.edu](mailto:wysockil@wabash.edu)

**S2: <sup>1</sup>H and <sup>13</sup>C NMR Spectra for All Compounds**

RAC1075  
single\_pulse

<sup>1</sup>H NMR  
CDCl<sub>3</sub>  
400 MHz

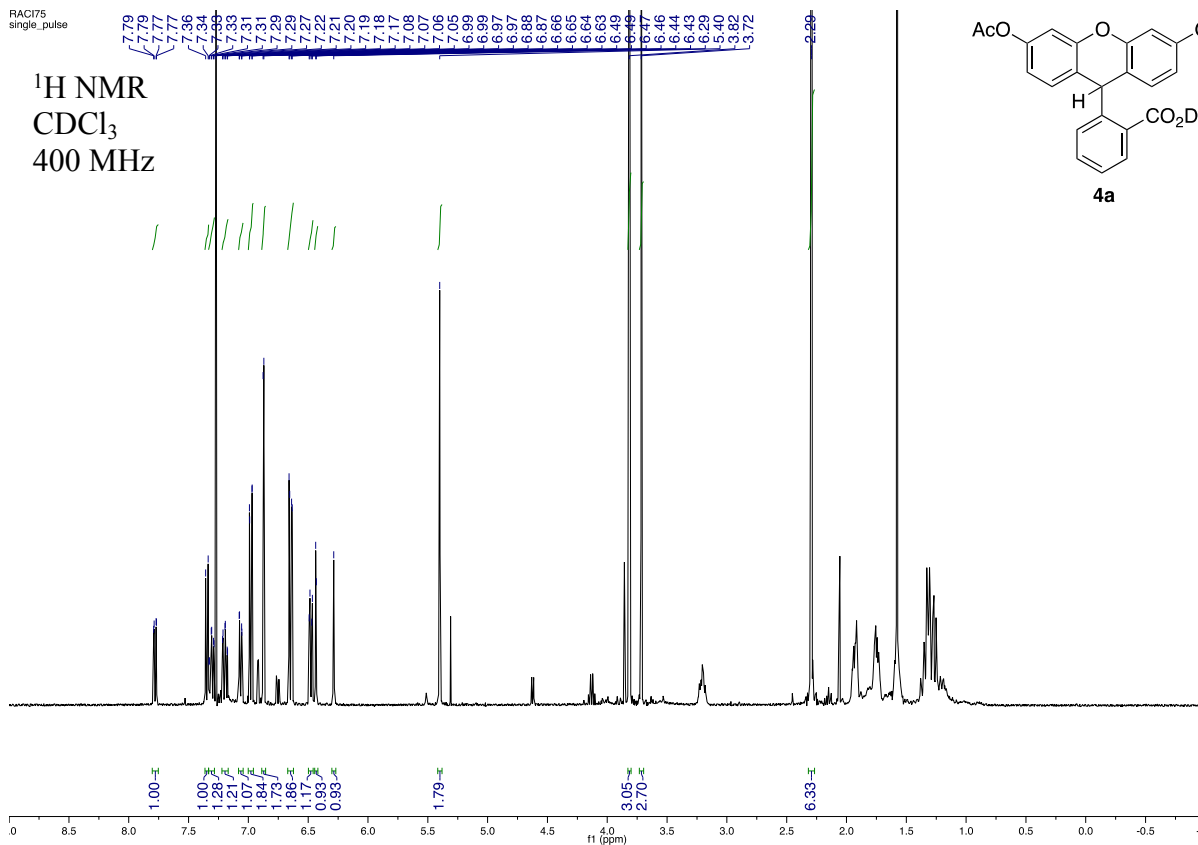

RAC1075  
single\_pulse

<sup>13</sup>C NMR  
CDCl<sub>3</sub>  
100 MHz

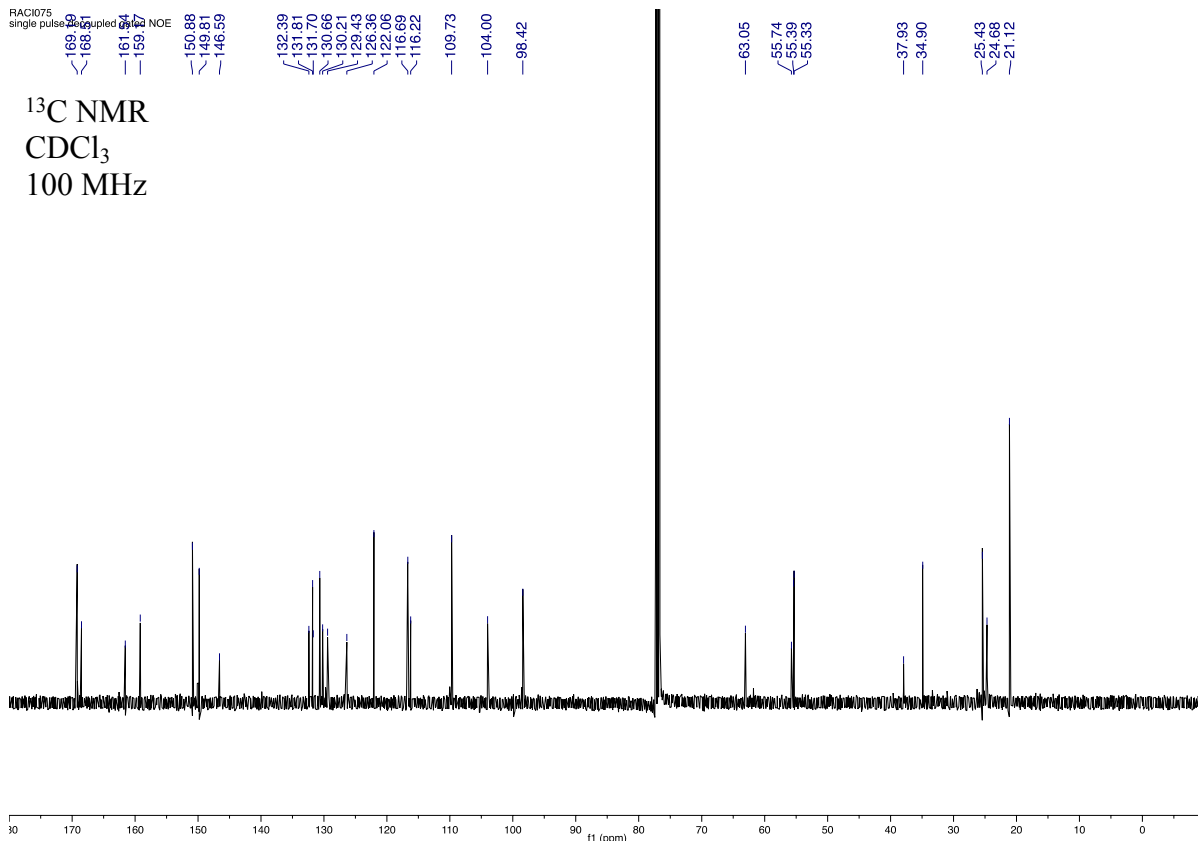

RAC1137  
single\_pulse

<sup>1</sup>H NMR  
CDCl<sub>3</sub>  
400 MHz

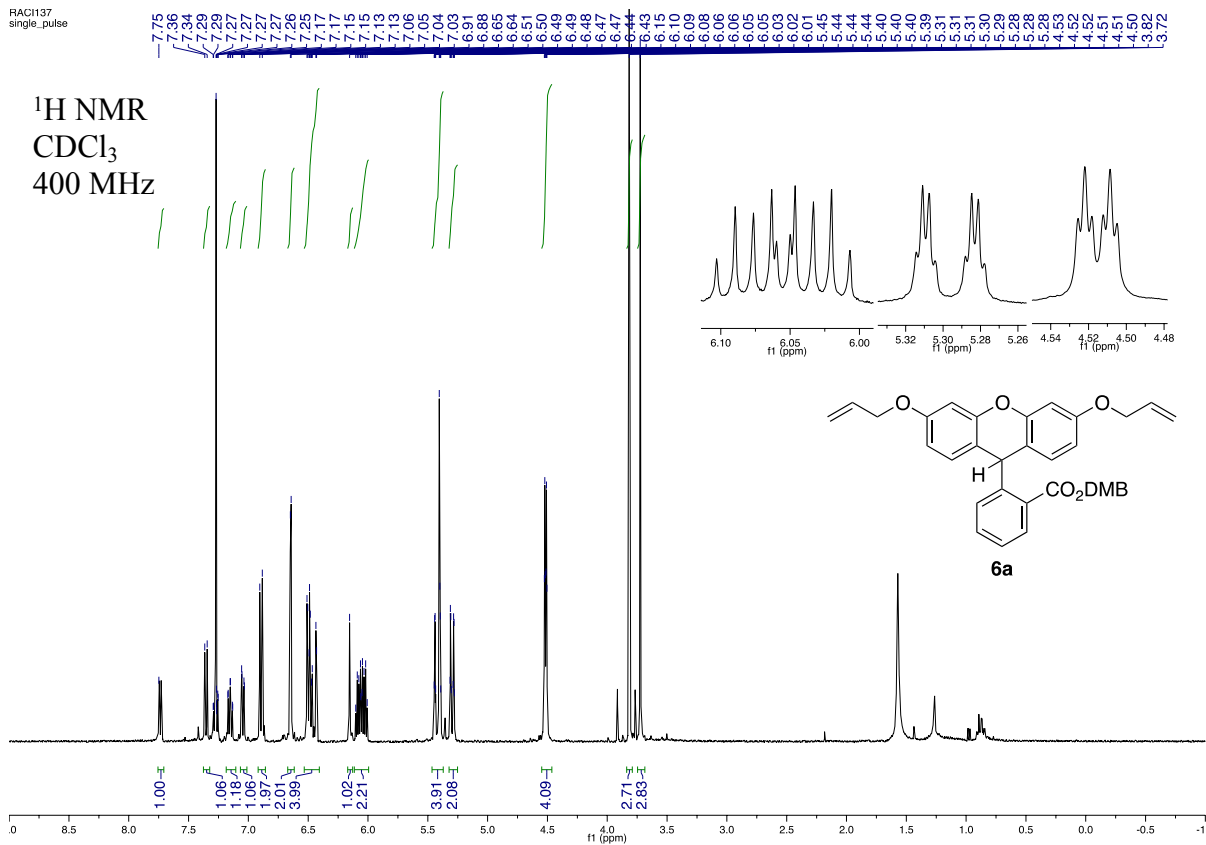

RAC1137 13C  
single\_pulse

<sup>13</sup>C NMR  
CDCl<sub>3</sub>  
100 MHz

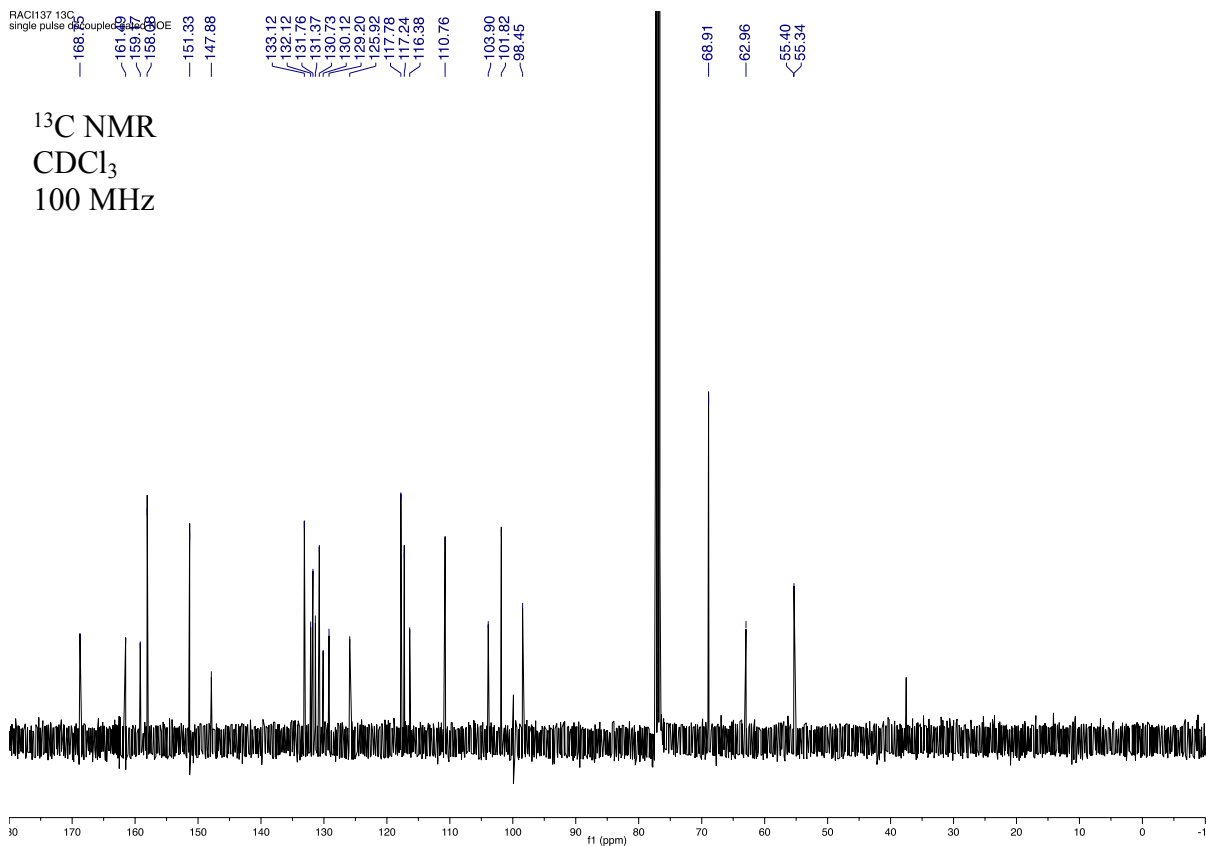

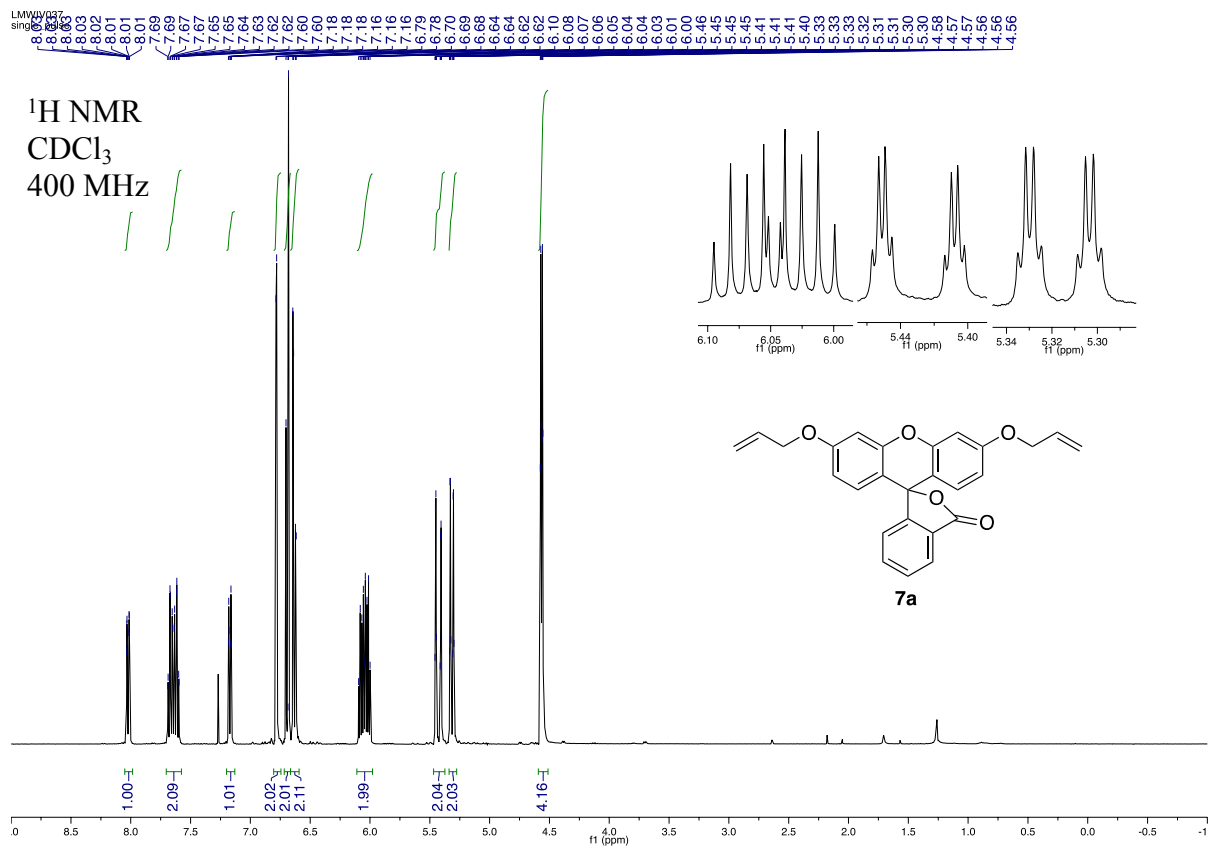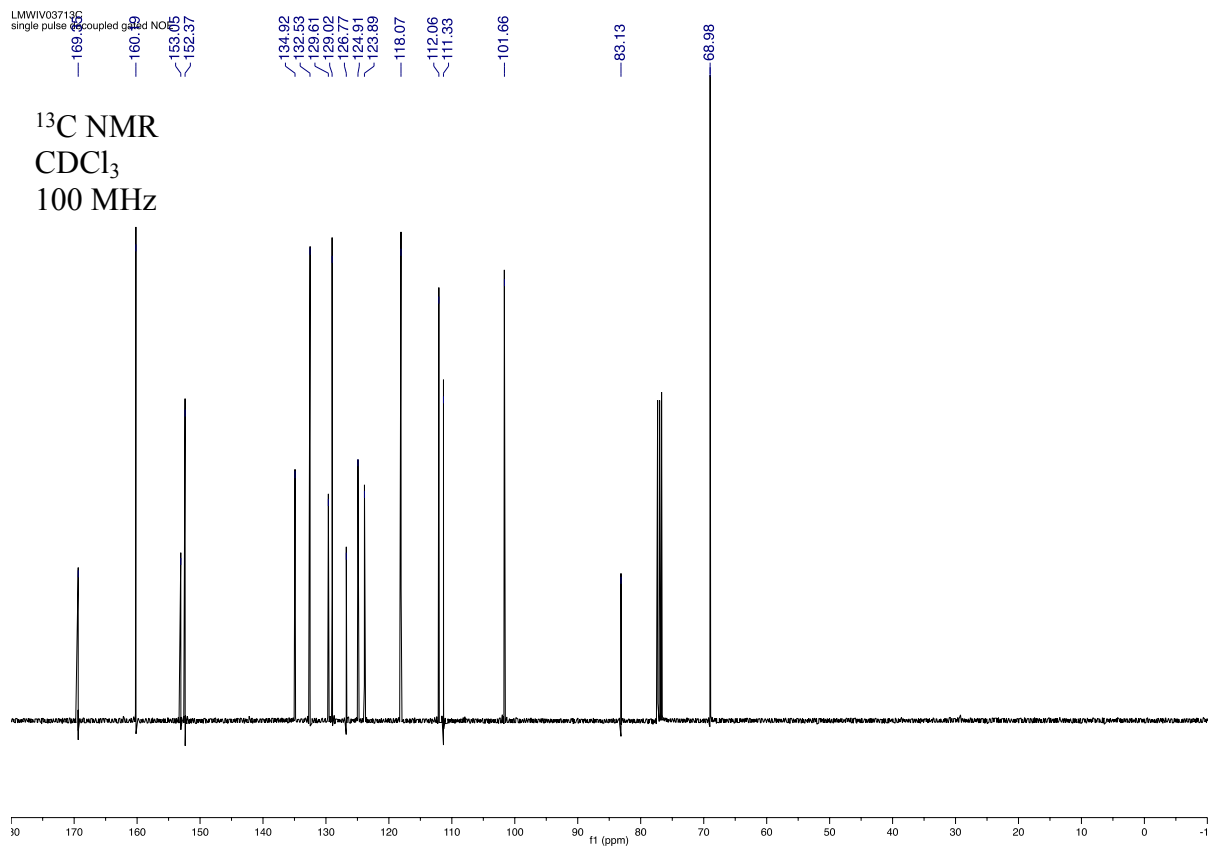

LMWV037DEPT135  
DEPT with decoupling

DEPT-135 NMR  
CDCl<sub>3</sub>  
100 MHz

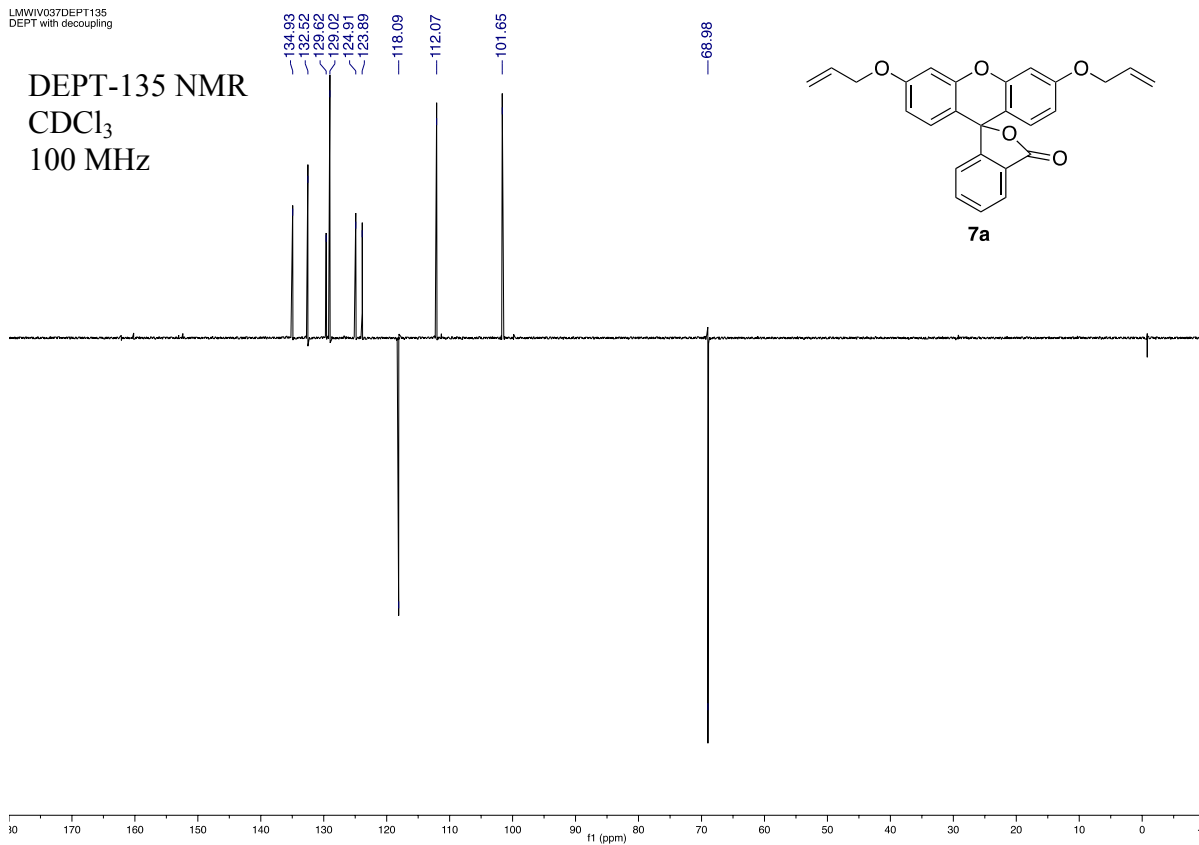

LMW0017  
single\_pulse

<sup>1</sup>H NMR  
CDCl<sub>3</sub>  
400 MHz

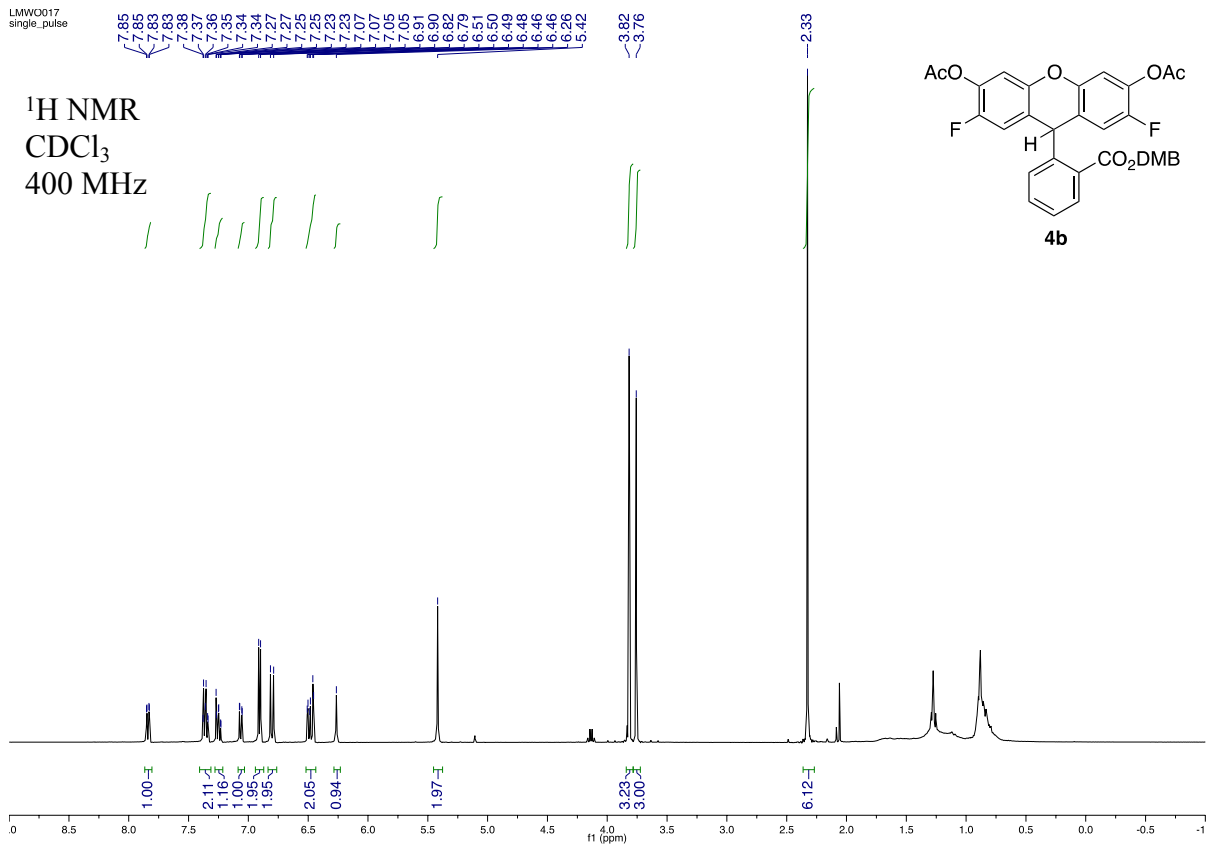

LMW001713C  
single\_pulse

<sup>13</sup>C NMR  
CDCl<sub>3</sub>  
100 MHz

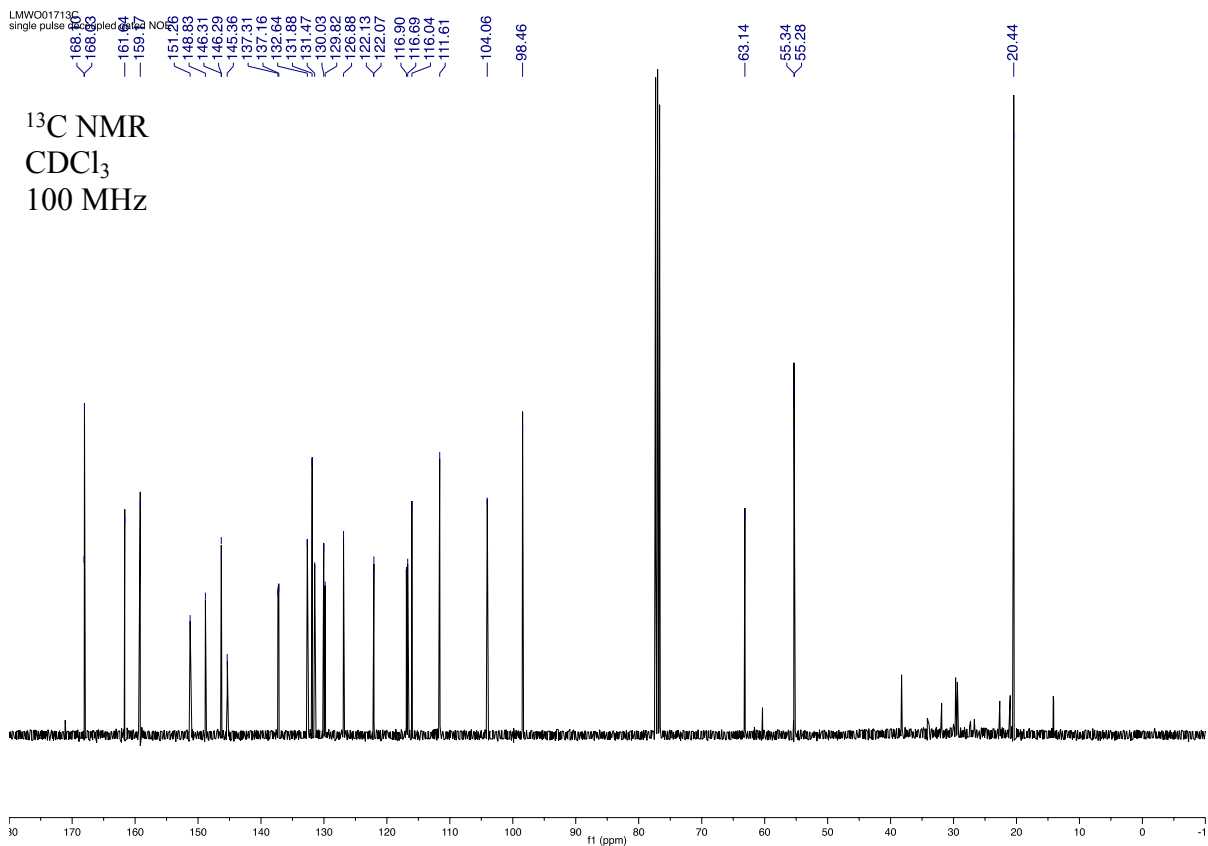

LMW0017DEPT135  
DEPT with decoupling

DEPT-135 NMR  
CDCl<sub>3</sub>  
100 MHz

132.65  
131.88  
131.47  
129.52  
126.88

116.90  
116.69  
111.61  
104.04  
98.45

63.14  
55.34  
55.28

20.44

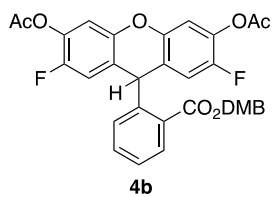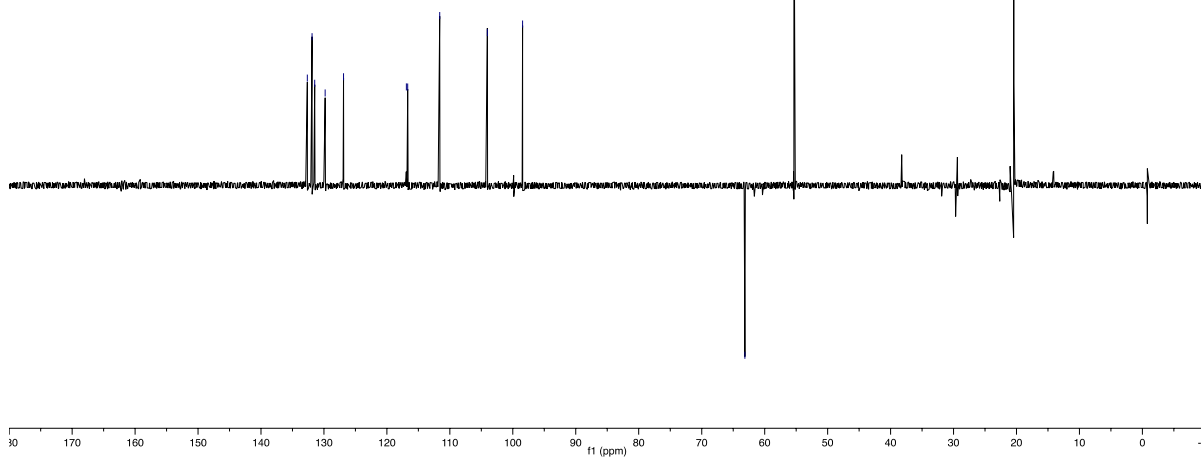

LMW0021  
single\_pulse

<sup>1</sup>H NMR  
CDCl<sub>3</sub>  
400 MHz

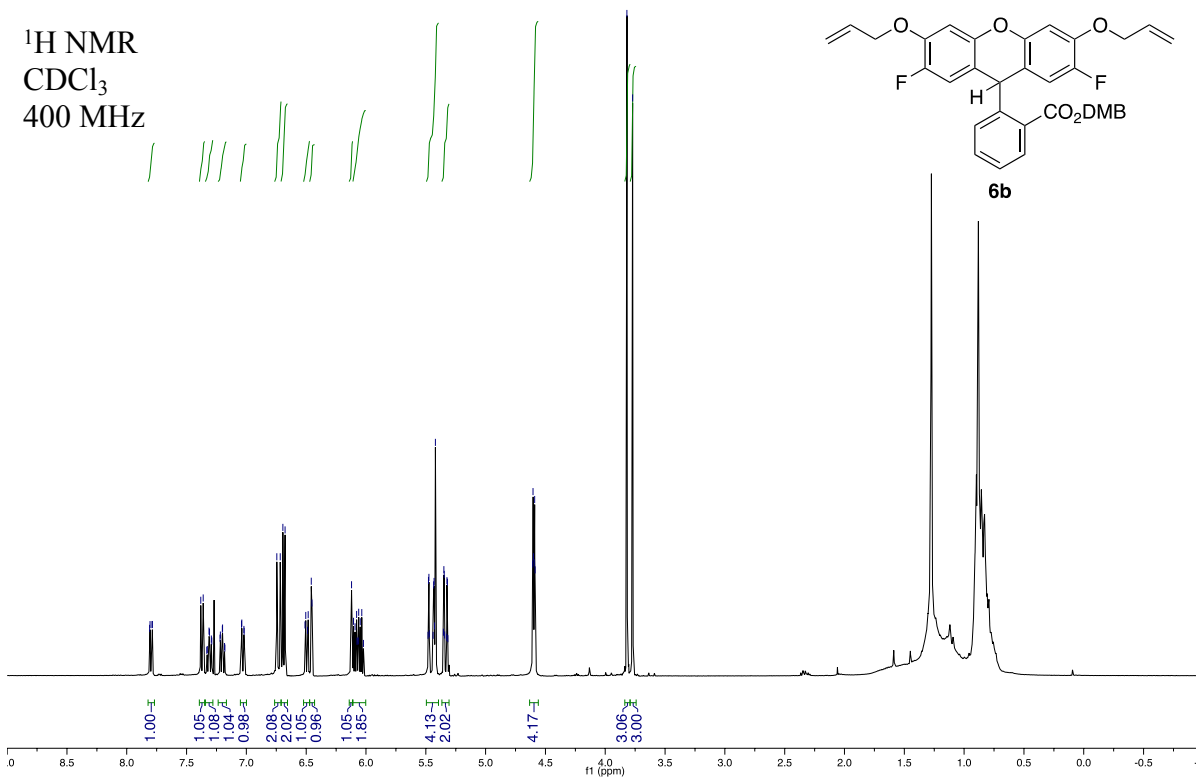

LMW002113C  
single\_pulse decoupled

<sup>13</sup>C NMR  
CDCl<sub>3</sub>  
100 MHz

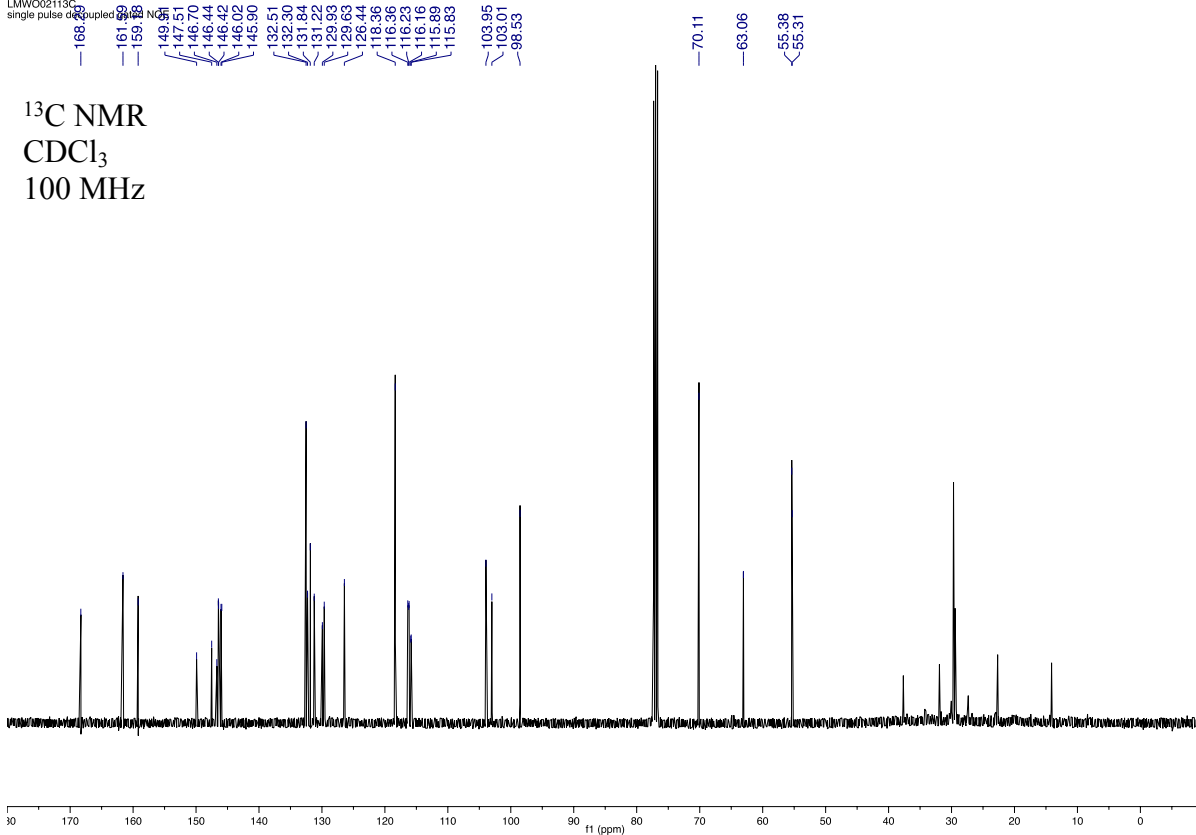



LMW0021DEPT135  
DEPT with decoupling

DEPT-135 NMR  
CDCl<sub>3</sub>  
100 MHz

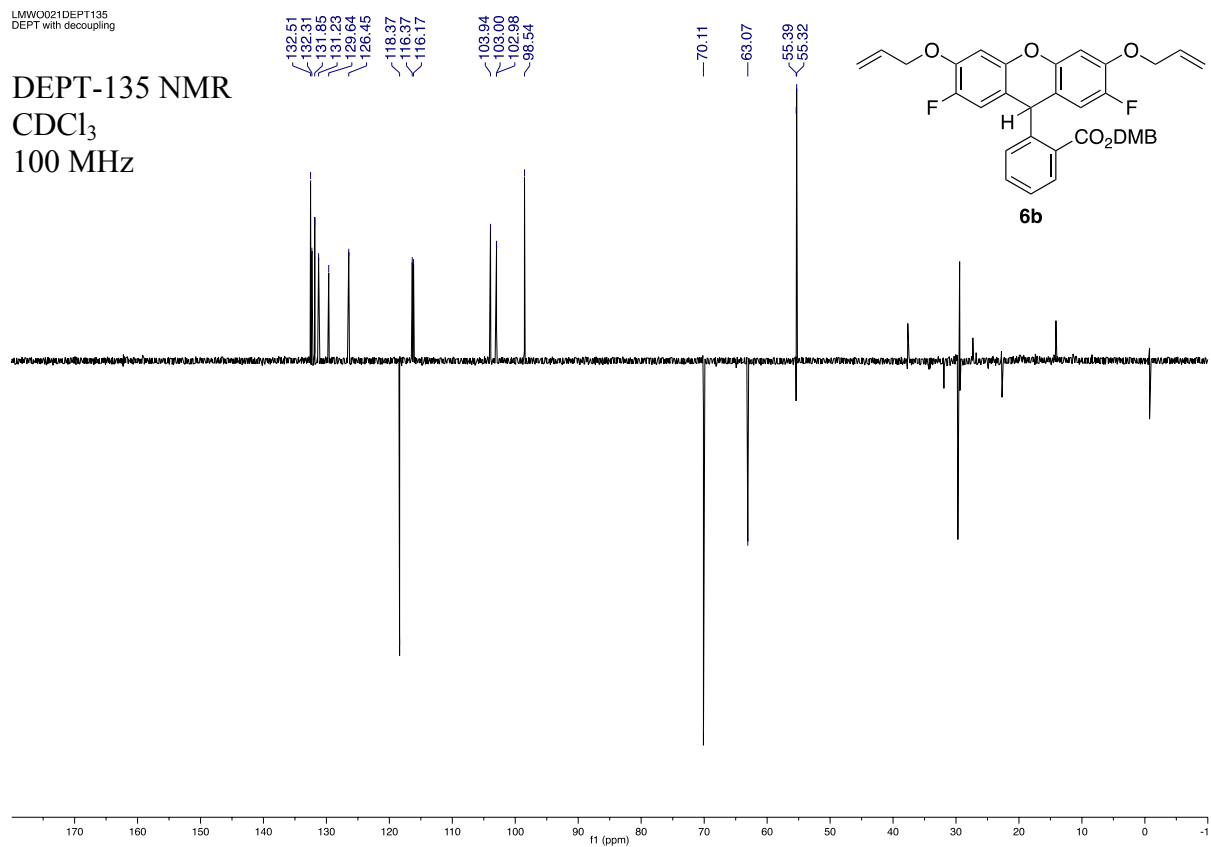

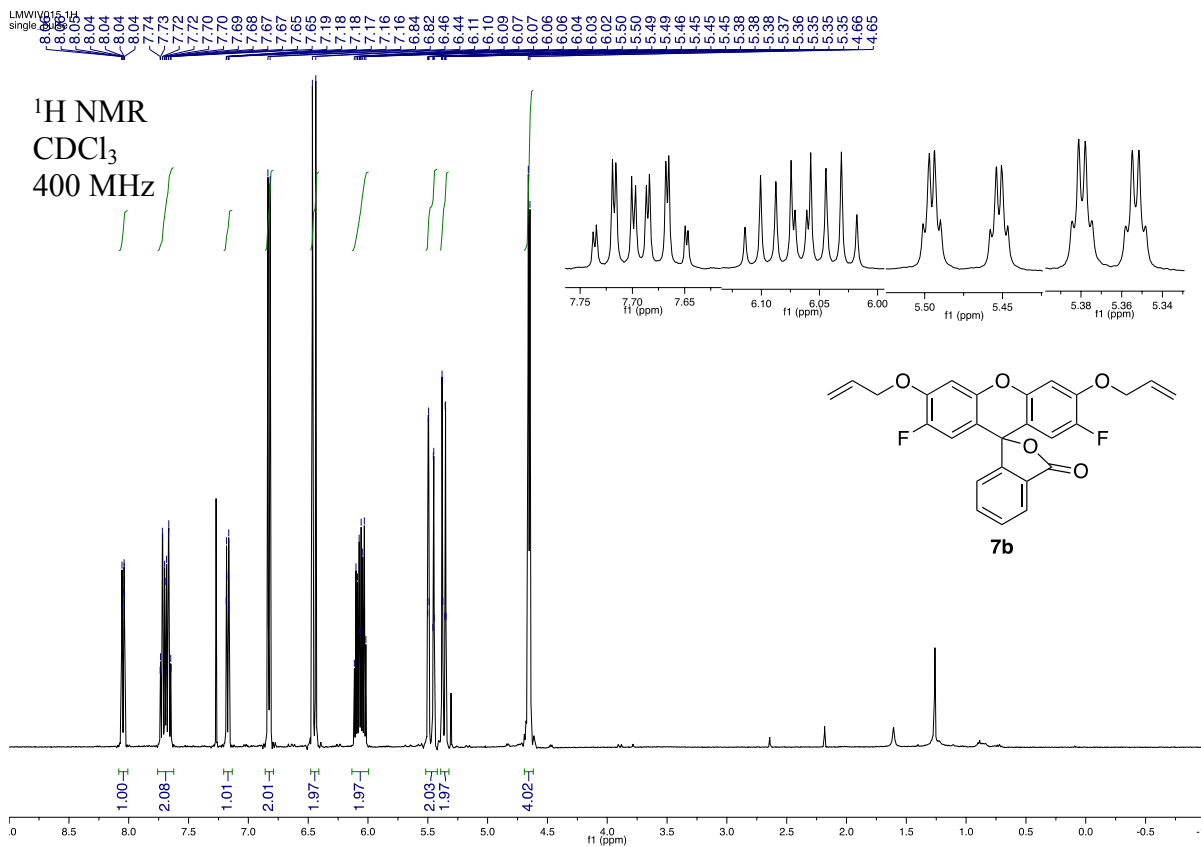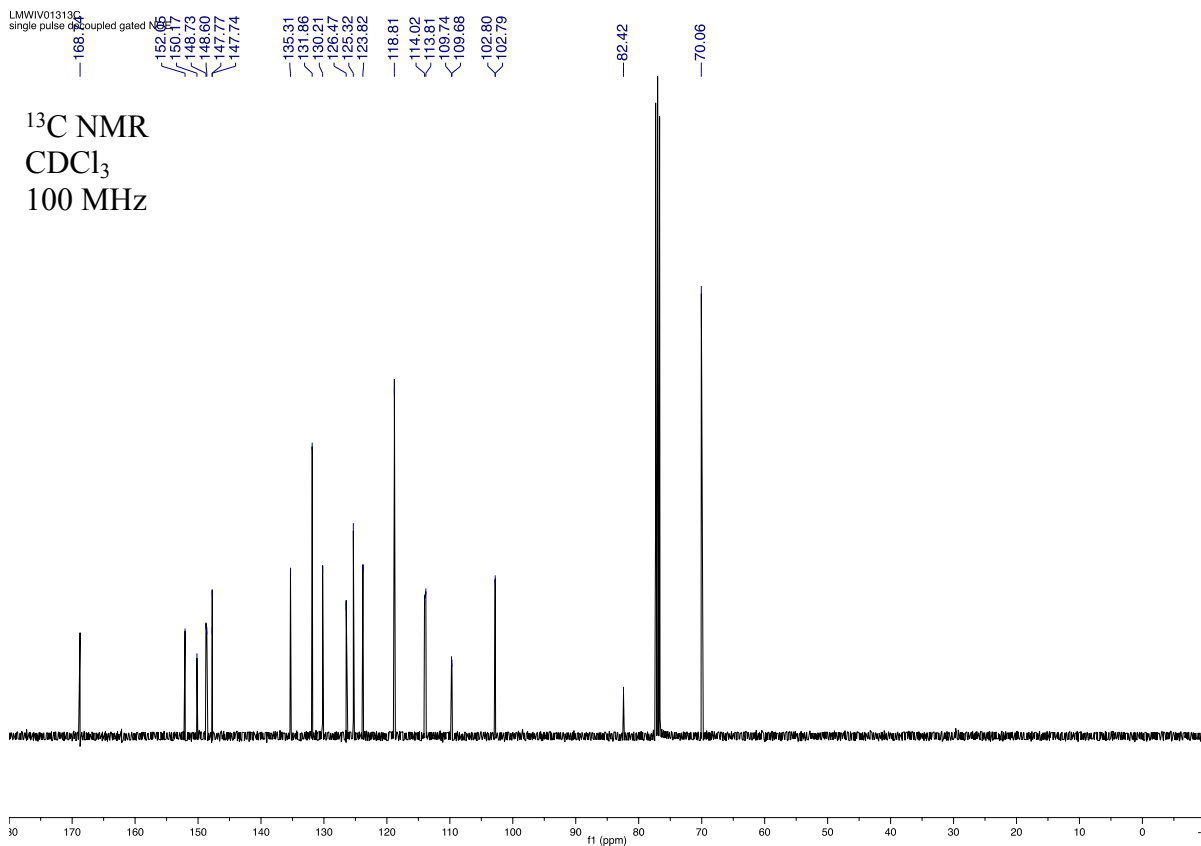

LMWIV013DEPT135  
DEPT with decoupling

DEPT-135 NMR  
CDCl<sub>3</sub>  
100 MHz

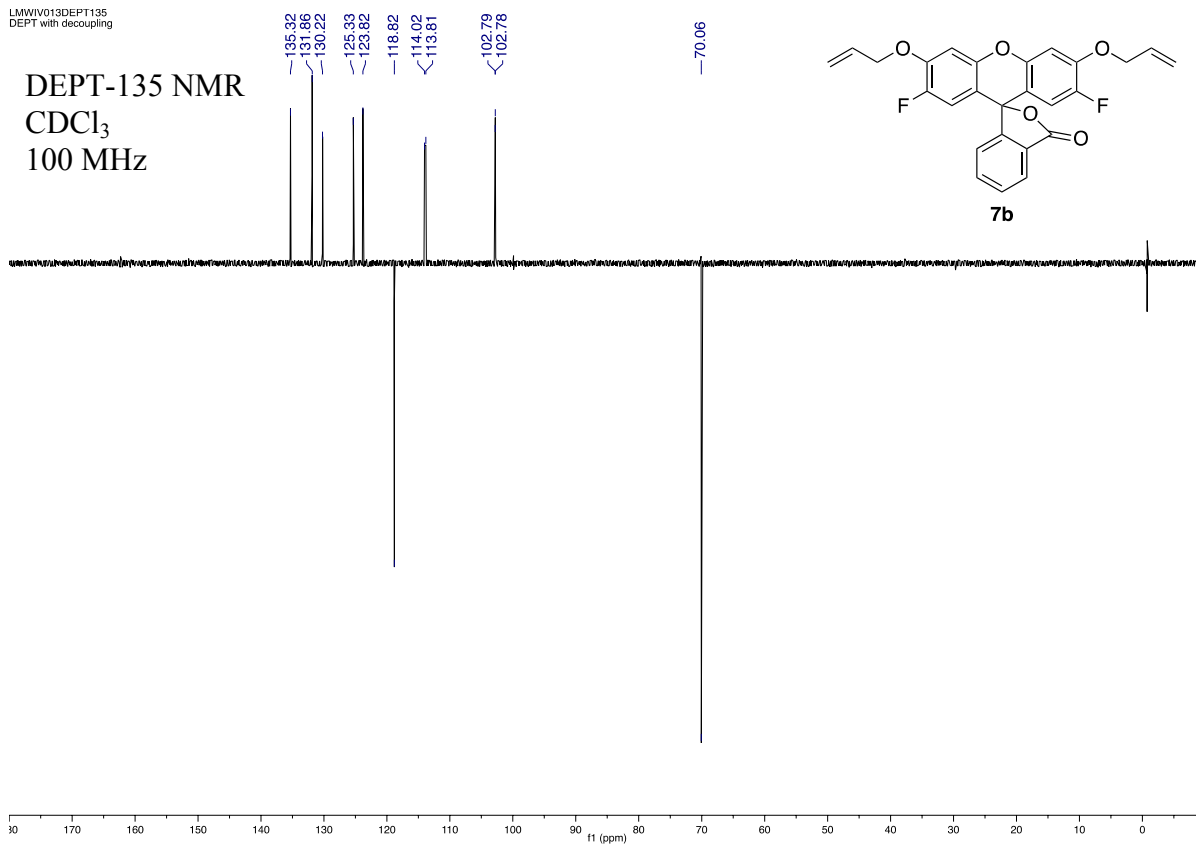

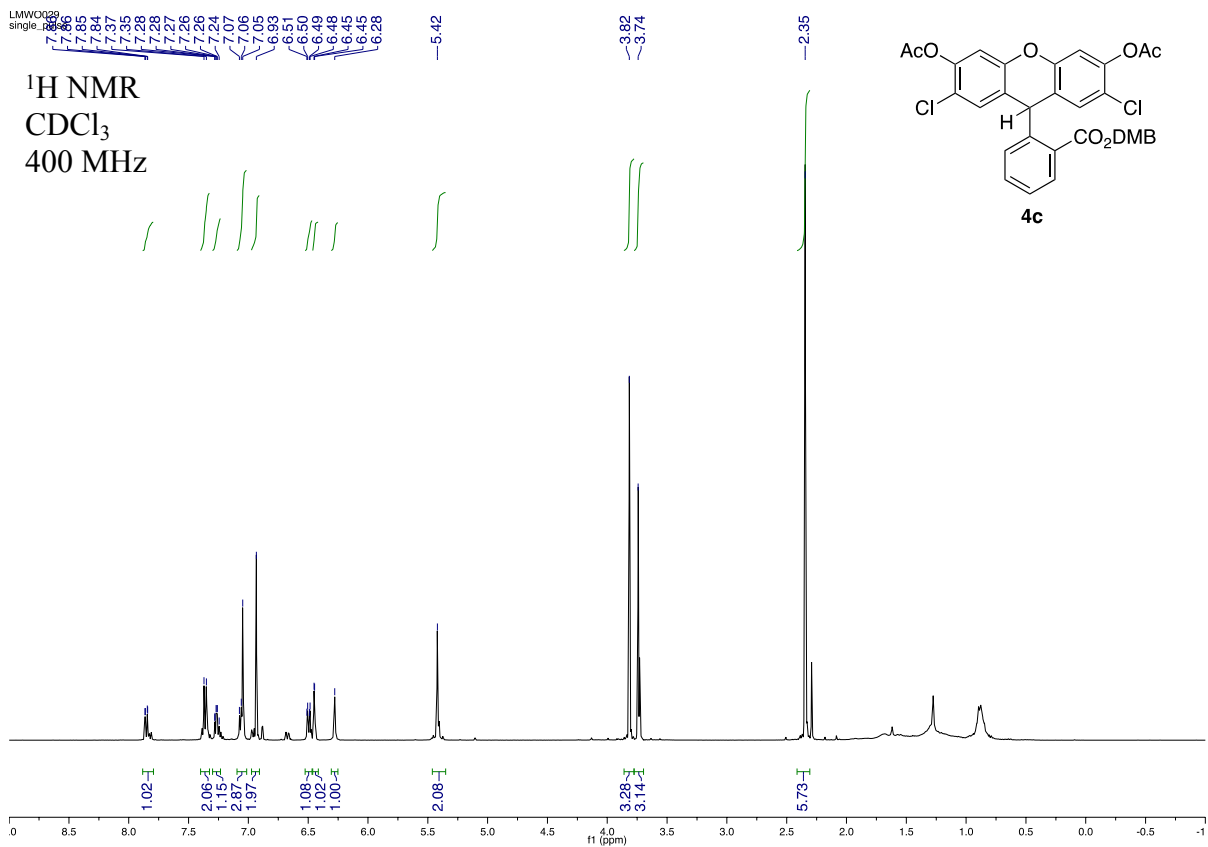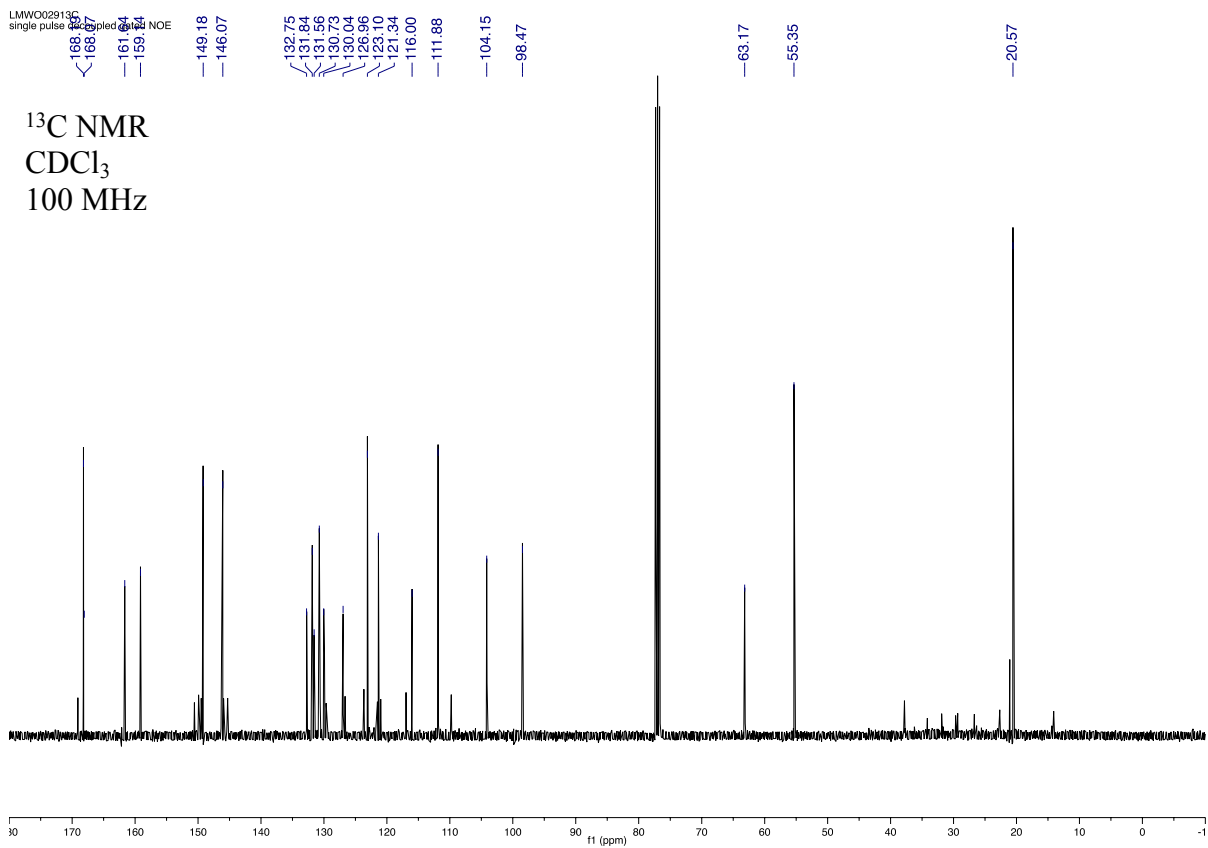

LMW0029DEPT135  
DEPT with decoupling

DEPT-135 NMR  
CDCl<sub>3</sub>  
100 MHz

132.76  
131.85  
130.73  
126.96

111.88

104.14

98.47

63.17

55.35

20.57

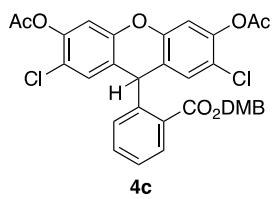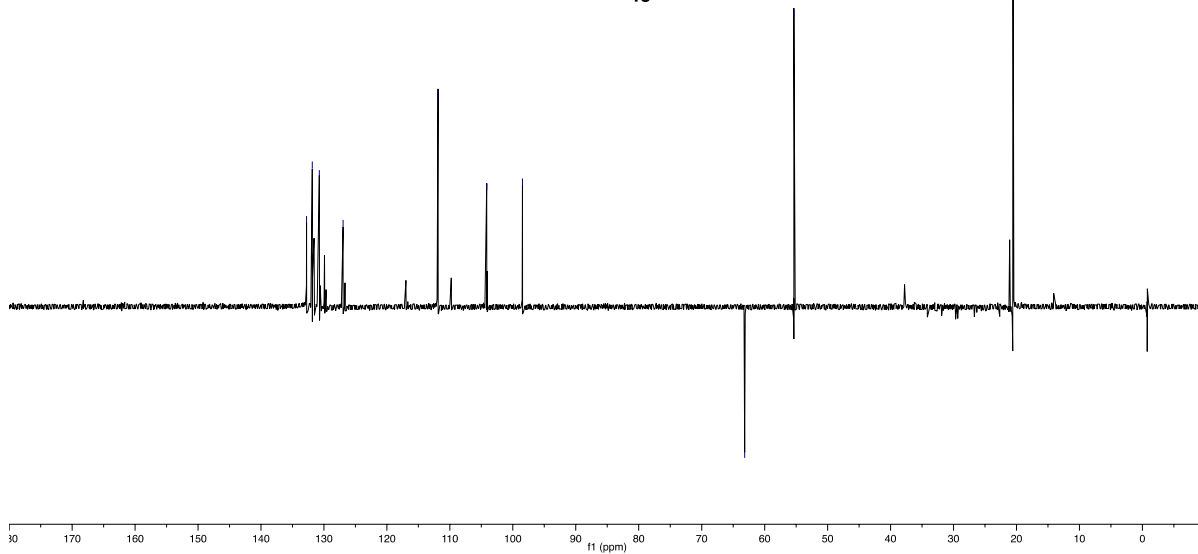

LMW0027  
single\_pulse

<sup>1</sup>H NMR  
CDCl<sub>3</sub>  
400 MHz

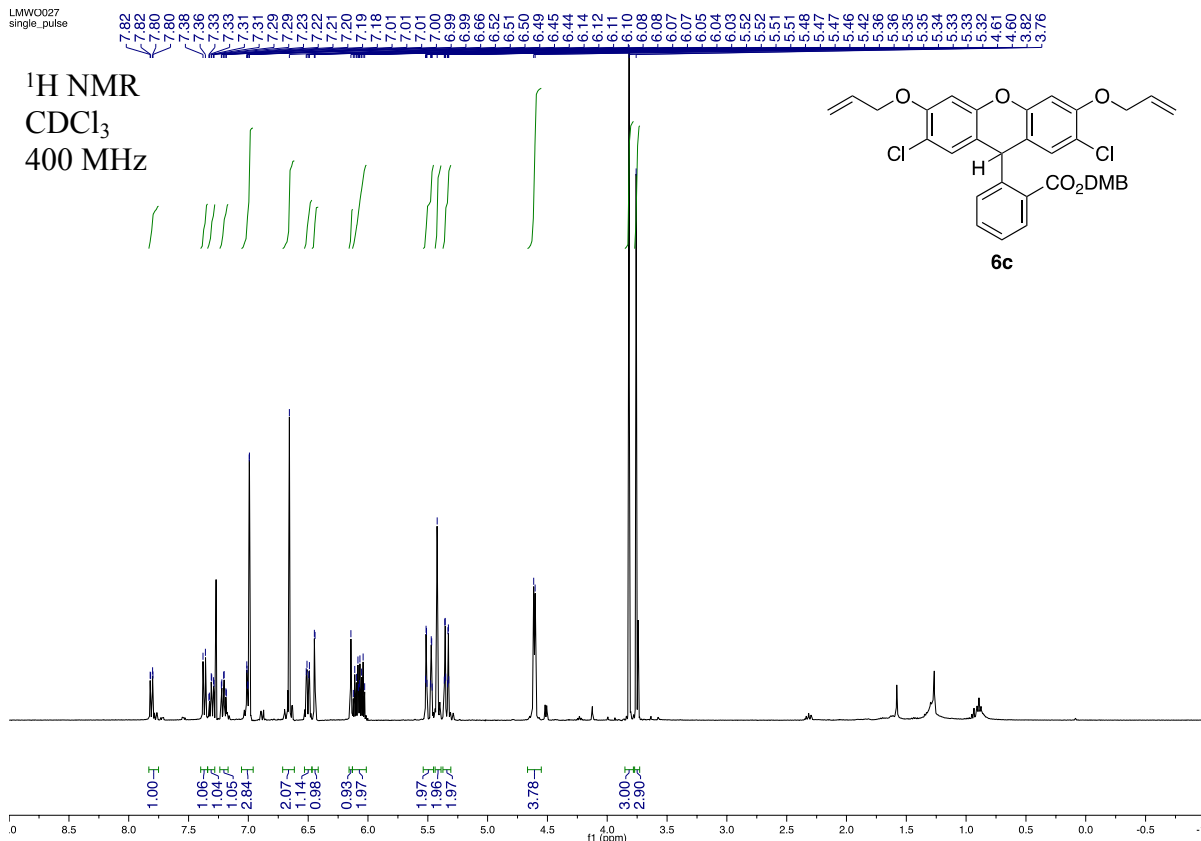

LMW002713G  
single\_pulse decoupled NOESY

<sup>13</sup>C NMR  
CDCl<sub>3</sub>  
100 MHz

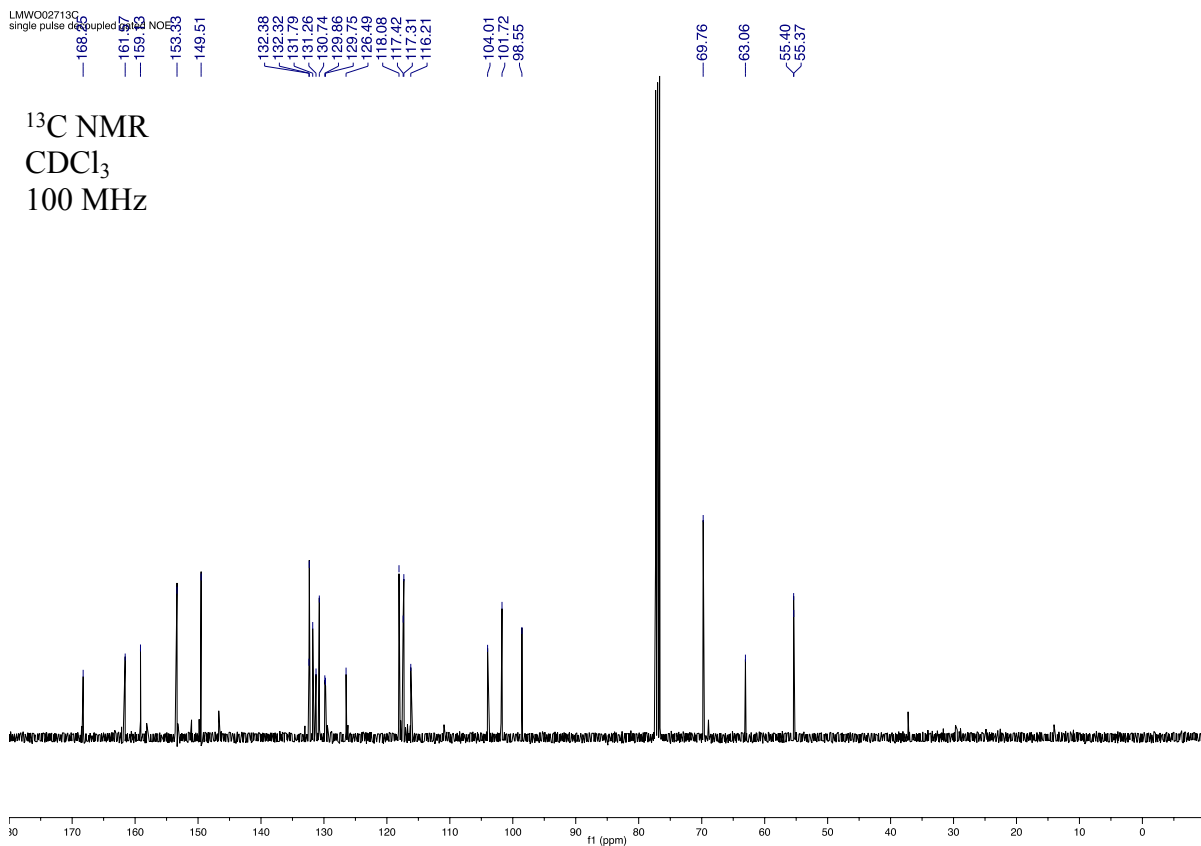

LMW0027DEPT135  
DEPT with decoupling

DEPT-135  
CDCl<sub>3</sub>  
100 MHz

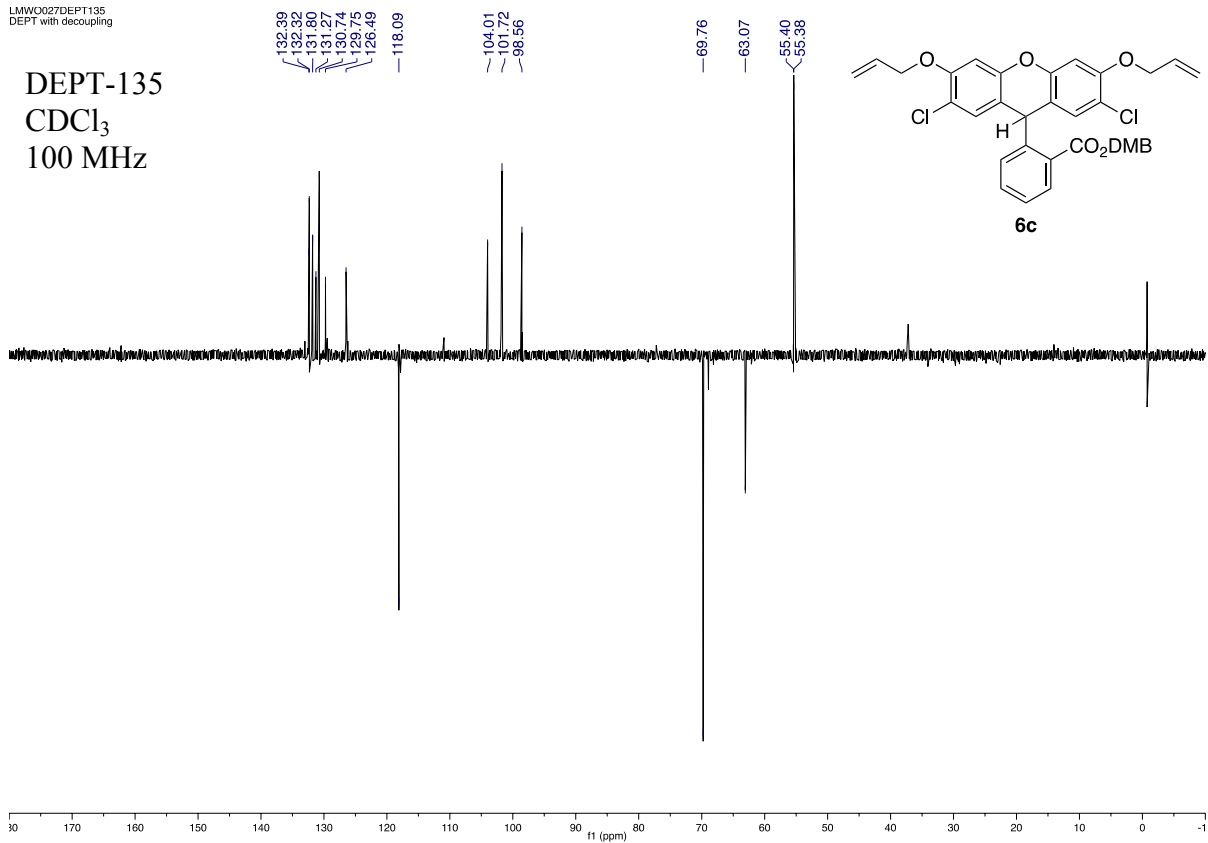

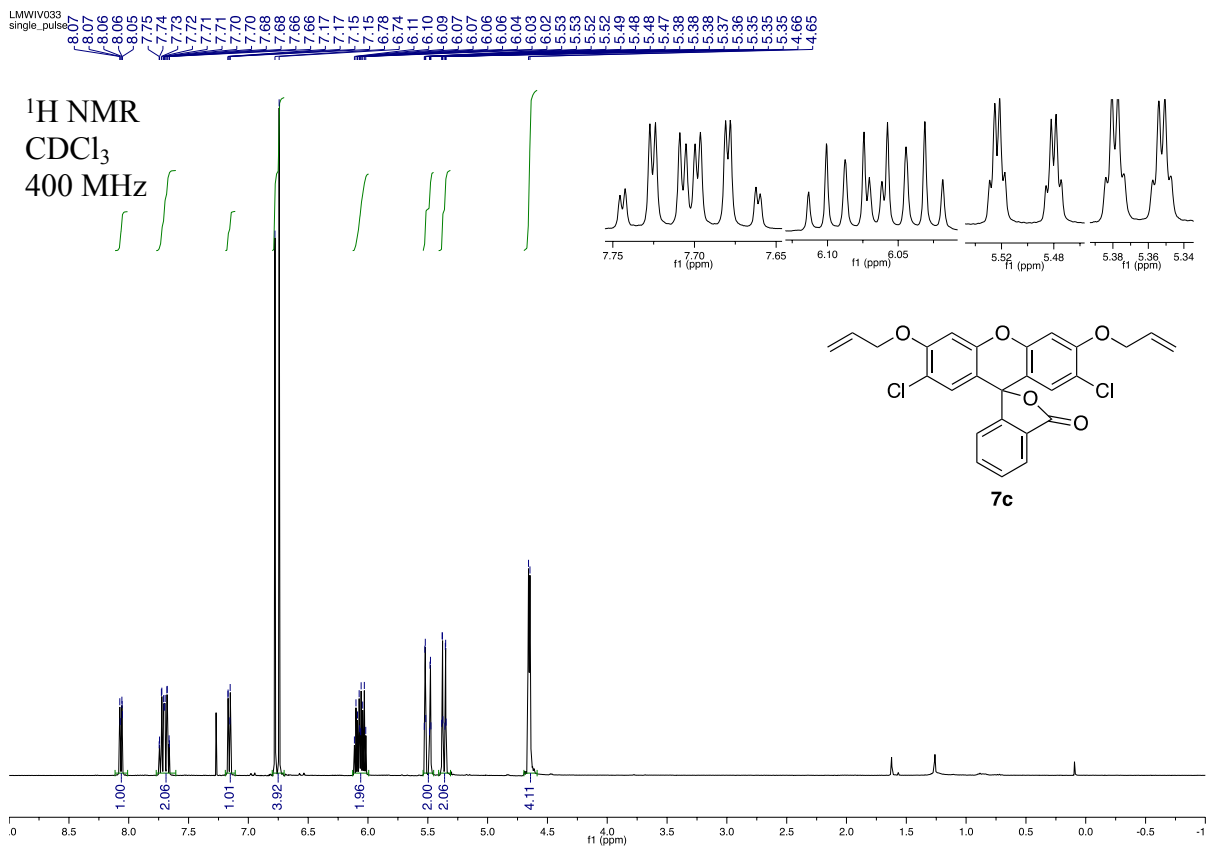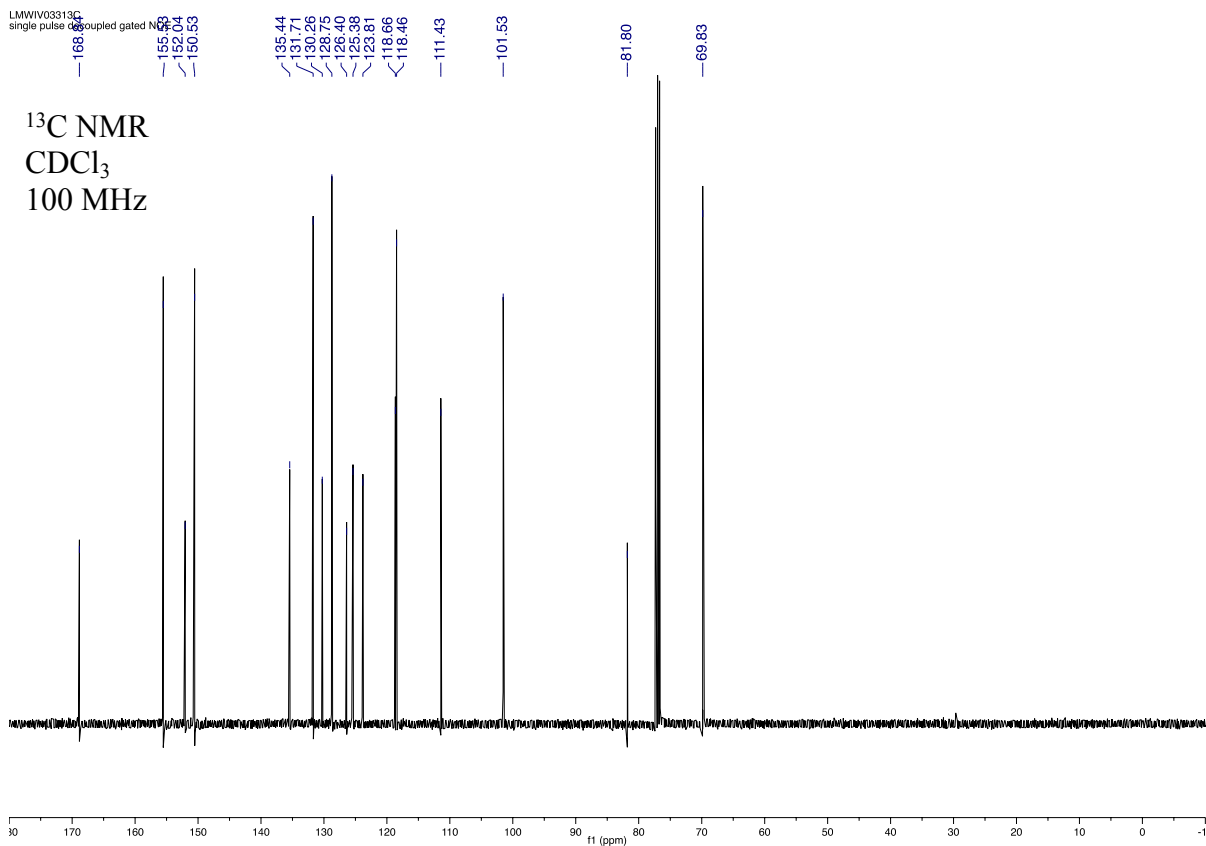



LMWIV033DEPT135  
DEPT with decoupling

DEPT-135  
CDCl<sub>3</sub>  
100 MHz

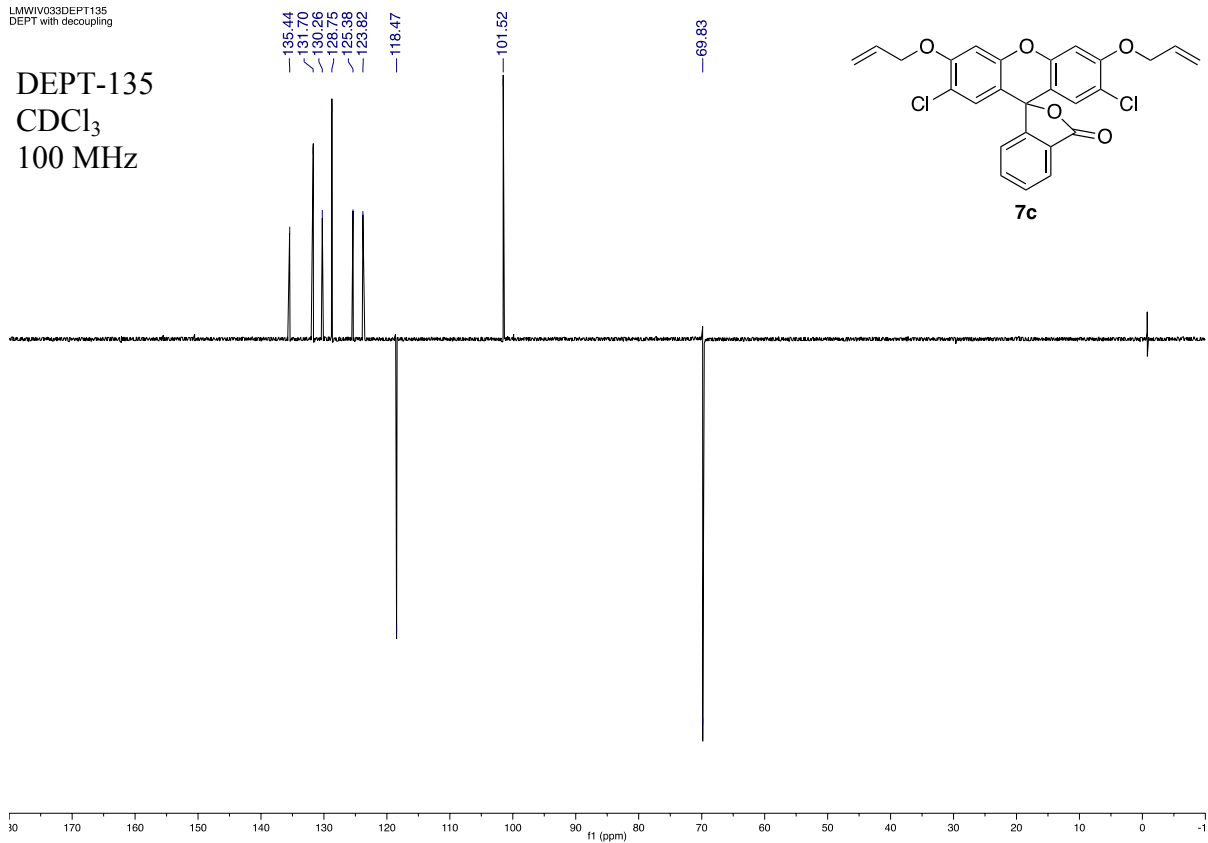

Supplement: c5cc02192h2.pdf [file c5cc02192h2.pdf]
